# Supplementary material for: New insights into the influence mechanism of H2O and SO2 on Pt–W/Ti catalysts for CO oxidation
Source: Royal Society of Chemistry journal article supplement (doi:10.1039/d1cy01984h), 2022-01-01
Supplement: d1cy01984h1.pdf [file d1cy01984h1.pdf]

**New insights into the influence mechanism of H<sub>2</sub>O and SO<sub>2</sub> on Pt-W/Ti catalysts  
for CO oxidation**

**Tieyao Xu<sup>a, b</sup>, Xiaolong Liu<sup>b\*</sup>, Tingyu Zhu<sup>b, c\*</sup>, Chenglin Feng<sup>a, b</sup>, Yutao Hu<sup>b</sup>, Mengkui Tian<sup>a</sup>**

a. School of Chemistry and Chemical Engineering, Guizhou University, Guiyang, Guizhou 550025,  
China

b. CAS Key Laboratory of Green Process and Engineering, Institute of Process Engineering, Innovation  
Academy for Green Manufacture, Chinese Academy of Sciences, Beijing 100190, China

c. Center for Excellence in Regional Atmospheric Environment, Institute of Urban Environment, Chinese  
Academy of Sciences, Xiamen 361021, China

**Author information**

\*Corresponding author. Tel: 86-10-82544821;

E-mail: liuxl@ipe.ac.cn (Xiaolong Liu); tyzhu@ipe.ac.cn (Tingyu Zhu)

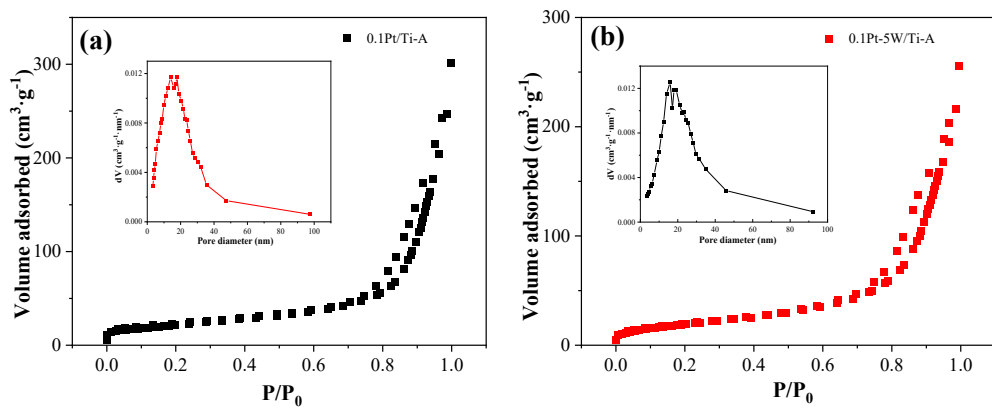

Fig. S1  $N_2$  adsorption/desorption isotherms of 0.1Pt/Ti-A and 0.1Pt-5W/Ti-A catalyst.

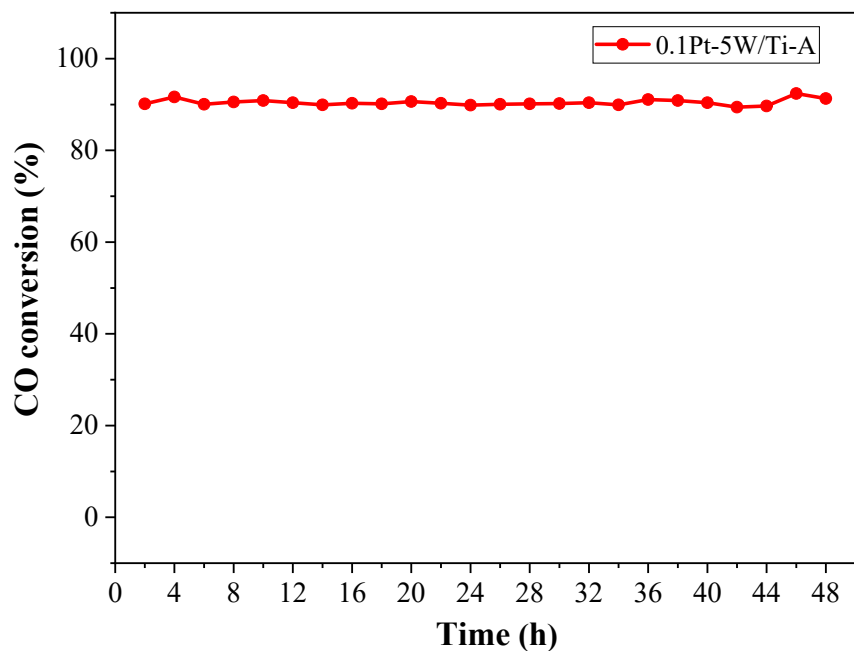

**Fig. S2** The stability tests of 0.1Pt-5W/Ti-A, reaction conditions: 1% CO, 16% O<sub>2</sub>, 200ppm NO, 10% H<sub>2</sub>O, 50 ppm SO<sub>2</sub>, N<sub>2</sub> as balance gas, and space velocity is 90000 mL·g<sup>-1</sup>·h<sup>-1</sup> at 220 °C.

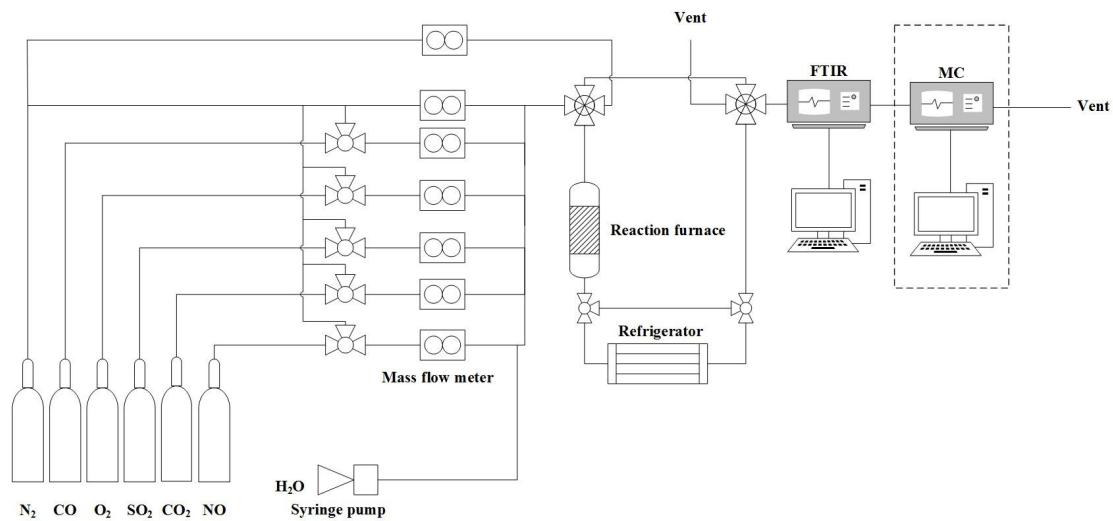

**Fig. S3** Experimental platform for the catalytic oxidation of CO.

**Table S1** BET specific surface area, pore volume and pore diameter of samples.

| Sample        | $S_{\text{BET}}$<br>( $\text{m}^2 \cdot \text{g}^{-1}$ ) | $V_{\text{pore}}$<br>( $\text{cm}^3 \cdot \text{g}^{-1}$ ) | $D_{\text{pore}}$<br>(nm) |
|---------------|----------------------------------------------------------|------------------------------------------------------------|---------------------------|
| 0.1Pt/Ti-A    | 69.43                                                    | 0.292                                                      | 13.8                      |
| 0.1Pt-5W/Ti-A | 65.29                                                    | 0.285                                                      | 13.5                      |

**Table S2** The relative oxygen species amounts (at. %) of the samples.

| Sample        | Binding Energy (eV) |                   |                | $O_{\text{hydr}}/(O_{\text{hydr}}+O_{\text{latc}}+O_{\text{w}})$ |
|---------------|---------------------|-------------------|----------------|------------------------------------------------------------------|
|               | $O_{\text{latc}}$   | $O_{\text{hydr}}$ | $O_{\text{w}}$ |                                                                  |
| 0.1Pt/Ti-A    | 530.4               | 532.0             |                | 21.07                                                            |
| 0.1Pt-5W/Ti-A | 530.2               | 531.8             | 530.0          | 7.75                                                             |

**Table S3** Details of S 2p peak deconvolution.

| Sample           | Binding Energy (eV) |                     | Atomic % |
|------------------|---------------------|---------------------|----------|
|                  | S 2p <sub>3/2</sub> | S 2p <sub>1/2</sub> |          |
| 0.1Pt-5W/Ti-A-6  | 168.9               | 170.2               | 2.15     |
| 0.1Pt-5W/Ti-A-24 | 168.5               | 170.1               | 2.04     |
